# Supplementary material for: Trend of HPV Molecular Epidemiology in the Post-Vaccine Era: A 10-Year Study
Source: MDPI journal article supplement (doi:10.3390/v15102015), 2023-09-27
Supplement: s1 [file s1]

**Table S1.** Trend change of high risk and non-high risk HPV genotype infections over time in different age groups.

### Test trend for different age group

| Age group | High risk | Non high risk |
|-----------|-----------|---------------|
| >70       | 0.7561    | 0.3262        |
| 20-30     | 0.9583    | 0.9962        |
| 30-40     | 0.3546    | 0.7012        |
| 40-50     | 0.1203    | 0.0022        |
| 50-60     | 0.4213    | 0.0036        |
| 60-70     | < 0.001   | < 0.001       |
| 0-20      | 1.000     | 0.8276        |

**Table S2.** Statistical testing of high risk and non-high risk genotypes under different age groups over 2010-2020.

### Comparisons of high risk and non high risk each year under each age group

| Year        | Age group |        |          |        |          |        |        |
|-------------|-----------|--------|----------|--------|----------|--------|--------|
|             | >70       | 20-30  | 30-40    | 40-50  | 50-60    | 60-70  | 0-20   |
| <b>2010</b> | 0.4901    | 0.2193 | 0.0022   | 0.0008 | 0.0878   | 0.1396 | NA     |
| <b>2011</b> | 0.9858    | 0.7197 | 0.0323   | 0.2720 | 0.0035   | 0.2383 | NA     |
| <b>2012</b> | 0.0610    | 0.6448 | 0.0001   | 1      | 0.0001   | 0.1194 | 0.1463 |
| <b>2013</b> | 0.6565    | 1      | 0.0019   | 0.4942 | 0.0150   | 0.9130 | 0.4667 |
| <b>2014</b> | 0.5543    | 0.0501 | 0.0004   | 0.5176 | < 0.0001 | 0.3573 | NA     |
| <b>2015</b> | 0.6480    | 0.2421 | < 0.0001 | 0.2729 | 0.0002   | 0.0099 | 0.4576 |
| <b>2016</b> | 0.5099    | 0.0275 | 0.0006   | 0.7809 | 0.1109   | 0.0001 | 0.4657 |
| <b>2017</b> | 0.6859    | 0.5246 | 0.0003   | 0.2586 | 0.0152   | 0.3353 | NA     |
| <b>2018</b> | 0.4952    | 0.0179 | 0.0003   | 0.1523 | 0.6429   | 0.0026 | 0.2143 |
| <b>2019</b> | 0.7299    | 0.6252 | < 0.0001 | 0.7256 | 0.0201   | 0.0538 | 1      |
| <b>2020</b> | 0.4838    | 0.9661 | 0.2692   | 0.2533 | 0.0256   | 0.9611 | NA     |

**Table S3.** Statistical testing of trend change for the HPV genotypes.

| <b>Genotype</b> | <b>p-value</b> |
|-----------------|----------------|
| HPV-16          | 0.6824         |
| HPV-18          | 0.6335         |
| HPV-31          | 0.018          |
| HPV-33          | 0.0089         |
| HPV-35          | 0.0901         |
| HPV-39          | <0.001         |
| HPV-45          | 0.8749         |
| HPV-51          | <0.001         |
| HPV-52          | 0.0972         |
| HPV-56          | 0.5243         |
| HPV-58          | 0.0075         |
| HPV-59          | <0.001         |
